# Supplementary material
Source: HighWire-hosted journal article supplement (https://www.rsfjournal.org/highwire/filestream/3558/field_highwire_adjunct_files/0/FordingPatton-appendix.pdf)
Supplement: FordingPatton-appendix.pdf [file FordingPatton-appendix.pdf]

**APPENDIX to “The Affordable Care Act and the Diffusion of Policy Feedback: The Case of Medicaid Work Requirements.”**

**Table A-1. Medicaid Expansion States by Decision Date and Presiding Governor**

| <b>State</b>              | <b>Decision Date</b> | <b>Governor (Party)</b> |
|---------------------------|----------------------|-------------------------|
| Alaska                    | July 2015            | Walker (I)              |
| Arizona                   | June 2013            | Brewer (R)              |
| Arkansas                  | April 2013           | Beebe (D)               |
| California                | June 2013            | Brown (D)               |
| Colorado                  | May 2013             | Hickenlooper (D)        |
| Connecticut               | June 2010            | Rell (R)                |
| Connecticut <sup>1</sup>  | January 2014         | Malloy (D)              |
| Delaware                  | January 2013         | Markell (D)             |
| Hawaii                    | June 2012            | Abercrombie (D)         |
| Illinois                  | July 2013            | Quinn (D)               |
| Indiana                   | January 2015         | Pence (R)               |
| Iowa                      | December 2013        | Branstad (R)            |
| Kentucky                  | May 2013             | Beshear (D)             |
| Louisiana                 | January 2016         | Edwards (D)             |
| Maryland                  | May 2013             | O’Malley (D)            |
| Massachusetts             | July 2013            | Patrick (D)             |
| Michigan                  | September 2013       | Snyder (R)              |
| Minnesota                 | February 2013        | Dayton (D)              |
| Missouri <sup>2</sup>     | February 2014        | Nixon (D)               |
| Montana                   | April 2015           | Bullock (D)             |
| Nevada                    | December 2012        | Sandoval (R)            |
| New Hampshire             | March 2014           | Hassan (D)              |
| New Jersey                | June 2013            | Christie (R)            |
| New Mexico                | January 2013         | Martinez (R)            |
| New York                  | June 2012            | Cuomo (D)               |
| North Dakota              | April 2013           | Dalrymple (R)           |
| Ohio                      | October 2013         | Kasich (R)              |
| Oregon                    | September 2013       | Kitzhaber (D)           |
| Pennsylvania              | August 2014          | Corbett (R)             |
| Pennsylvania <sup>1</sup> | February 2015        | Wolf (D)                |
| Rhode Island              | July 2013            | Chafee (I)              |
| Utah <sup>2</sup>         | December 2014        | Herbert (R)             |
| Vermont                   | July 2012            | Shumlin (D)             |
| Virginia <sup>2</sup>     | June 2014            | McAuliffe (D)           |
| Washington                | June 2013            | Inslee (D)              |
| West Virginia             | May 2013             | Tomblin (D)             |

Source: Kaiser Family Foundation.

<sup>1</sup> Successfully pursued a second expansion of Medicaid that improved upon the expansion overseen by predecessor.

<sup>2</sup> Introduced legislation to expand Medicaid but was defeated by the state legislature.

**Table A-2. Stated Support for Medicaid Work Requirements by the Governor or a Spokesperson, 2012-2019**

| <b>Governor (State-Party) Year</b> | <b>Brief Description of Support for Work Requirements</b>                                                                                                                                                                                                                                                                                                                                                                                                                                                                                                         |
|------------------------------------|-------------------------------------------------------------------------------------------------------------------------------------------------------------------------------------------------------------------------------------------------------------------------------------------------------------------------------------------------------------------------------------------------------------------------------------------------------------------------------------------------------------------------------------------------------------------|
| <b>Bentley (AL-R) 2015</b>         | <p>Legislative resolution passed opposing Medicaid expansion. Bentley commented he would be willing to pursue expansion as a “block grant”, in the “private sector”, and with “requirements on it”. Specifically mentioned the system being tied to employment: “(Recipients) need to be working on getting a job, or having a job.”</p> <p><a href="https://yellowhammernews.com/alabama-senate-to-bentley-do-not-expand-medicaid-under-any-scenario/">https://yellowhammernews.com/alabama-senate-to-bentley-do-not-expand-medicaid-under-any-scenario/</a></p> |
| <b>Ivy (AL-R) 2018</b>             | <p>Would only apply to “able-bodied” adults. Waiver would also increase some copays. “I look forward to future implementation of those policies.”</p> <p><a href="https://www.al.com/news/2018/01/alabama_wants_to_require_some.html">https://www.al.com/news/2018/01/alabama_wants_to_require_some.html</a></p>                                                                                                                                                                                                                                                  |
| <b>Ducey (AZ-R) 2015</b>           | <p>Called the cuts necessary to protect taxpayers and education; referred to the budget as “bipartisan, balanced . . . protects Arizona’s most vulnerable, while avoiding a tax increase.”</p> <p><a href="https://www.theguardian.com/us-news/2015/may/18/arizona-legislature-votes-cut-off-welfare-benefits-12-months">https://www.theguardian.com/us-news/2015/may/18/arizona-legislature-votes-cut-off-welfare-benefits-12-months</a></p>                                                                                                                     |
| <b>Ducey (AZ-R) 2018</b>           | <p>Application for waiver, including work requirements.</p> <p><a href="https://www.governing.com/topics/health-human-services/gov-medicaid-work-trump-drug-testing-kentucky.html">https://www.governing.com/topics/health-human-services/gov-medicaid-work-trump-drug-testing-kentucky.html</a></p>                                                                                                                                                                                                                                                              |
| <b>Ducey (AZ-R) 2019</b>           | <p>“Employment and community engagement are proven to have a positive effect on overall health and well-being.”</p> <p><a href="https://www.modernhealthcare.com/article/20190118/NEWS/190119901/cms-approves-arizona-s-tough-medicaid-work-requirement">https://www.modernhealthcare.com/article/20190118/NEWS/190119901/cms-approves-arizona-s-tough-medicaid-work-requirement</a></p>                                                                                                                                                                          |
| <b>Hutchinson (AR-R) 2015</b>      | <p>Medicaid “is supposed to be an incentive and encouragement for people to work versus an incentive for people to just receive the government benefit and not be part of a working culture of Arkansas.”</p> <p><a href="https://newrepublic.com/article/121717/medicaid-work-requirements-why-republicans-reasons-are-wrong">https://newrepublic.com/article/121717/medicaid-work-requirements-why-republicans-reasons-are-wrong</a></p>                                                                                                                        |
| <b>Hutchinson (AR-R) 2018</b>      | <p>“This is not about punishing anyone. It’s about giving people the opportunity to work. It’s to give them the training that they need. It’s to help move them out of poverty and up the economic ladder.”</p> <p><a href="https://money.cnn.com/2018/03/05/news/economy/arkansas-medicaid-work-requirements/index.html">https://money.cnn.com/2018/03/05/news/economy/arkansas-medicaid-work-requirements/index.html</a></p>                                                                                                                                    |
|                                    |                                                                                                                                                                                                                                                                                                                                                                                                                                                                                                                                                                   |

|                                 |                                                                                                                                                                                                                                                                                                                                                                                                                                                                                                                                                                     |
|---------------------------------|---------------------------------------------------------------------------------------------------------------------------------------------------------------------------------------------------------------------------------------------------------------------------------------------------------------------------------------------------------------------------------------------------------------------------------------------------------------------------------------------------------------------------------------------------------------------|
| <b>Hickenlooper (CO-D) 2018</b> | <p>Stated he knew the legislature was working on it and he was open to imposing work requirements on Medicaid recipients; “I have no problem with it.” Stated didn’t want to add new level of bureaucracy though to try to get a small number of people to work.</p> <p><a href="https://www.denverpost.com/2018/03/29/colorado-medicaid-work-requirement-fails/">https://www.denverpost.com/2018/03/29/colorado-medicaid-work-requirement-fails/</a></p>                                                                                                           |
| <b>Scott (FL-R) 2017</b>        | <p>He wants Florida to be treated “equitably”. He favors changes that would enhance flexibility at the state level for things such as work requirements.</p> <p><a href="https://www.orlandosentinel.com/politics/os-gov-scott-health-care-bill-20170623-story.html">https://www.orlandosentinel.com/politics/os-gov-scott-health-care-bill-20170623-story.html</a></p>                                                                                                                                                                                             |
| <b>DeSantis (FL-R) 2019</b>     | <p>Miami Herald notes regarding legislative action, “The House has also been advancing work requirements for Medicaid – a policy supported by Gov. Ron DeSantis and a longtime conservative wish list item...”</p> <p><a href="https://www.tampabay.com/florida-politics/2019/04/10/florida-lawmakers-keep-pushing-medicaid-work-requirements/">https://www.tampabay.com/florida-politics/2019/04/10/florida-lawmakers-keep-pushing-medicaid-work-requirements/</a></p>                                                                                             |
| <b>Little (ID-R) 2019</b>       | <p>Little stated, “I strongly support the goal to incentivize unemployed and underemployed individuals to engage in work and training opportunities to build financial stability . . . We must encourage self-sufficiency among those receiving public assistance.”</p> <p><a href="https://www.idahostatesman.com/news/politics-government/state-politics/article221290050.html">https://www.idahostatesman.com/news/politics-government/state-politics/article221290050.html</a></p>                                                                              |
| <b>Rauner (IL-R) 2018</b>       | <p>Stated to the Chicago Tribune he supports a work requirement for Medicaid recipients and “our administration is working on that”.</p> <p><a href="https://www.chicagotribune.com/news/opinion/editorials/ct-edit-medicaid-rauner-work-trump-20180116-story.html">https://www.chicagotribune.com/news/opinion/editorials/ct-edit-medicaid-rauner-work-trump-20180116-story.html</a></p>                                                                                                                                                                           |
| <b>Pence (IN-R) 2014</b>        | <p>He claimed he favored repeal of Obamacare and his plan was not caving to Obama by expanding Medicaid.</p> <p><a href="https://www.forbes.com/sites/theapothecary/2014/05/28/rhetoric-vs-reality-the-mike-pence">https://www.forbes.com/sites/theapothecary/2014/05/28/rhetoric-vs-reality-the-mike-pence</a></p>                                                                                                                                                                                                                                                 |
| <b>Holcomb (IN-R) 2017</b>      | <p>Holcomb’s spokeswoman said that letting states decide to impose work requirements and to take Medicaid funding as a block grant would “enable states to implement ‘innovative consumer-driven’ Medicaid programs like Indiana’s Health Indiana Plan (HIP 2.0).”</p> <p><a href="https://www.indystar.com/story/news/politics/2017/03/22/gov-eric-holcomb-backs-gop-health-care-bill-cuts-medicaid-funding/99486390/">https://www.indystar.com/story/news/politics/2017/03/22/gov-eric-holcomb-backs-gop-health-care-bill-cuts-medicaid-funding/99486390/</a></p> |
| <b>Holcomb (IN-R) 2018</b>      | <p>After Indiana’s work requirement was approved, the Trump administration noted that people who have jobs tend to be healthier. Holcomb stated “We know that work plays a central part (and) we want to appeal to an individual’s highest aspirations.”</p>                                                                                                                                                                                                                                                                                                        |

|                              |                                                                                                                                                                                                                                                                                                                                                                                                                                                                                                                                                                                                                                                                                                               |
|------------------------------|---------------------------------------------------------------------------------------------------------------------------------------------------------------------------------------------------------------------------------------------------------------------------------------------------------------------------------------------------------------------------------------------------------------------------------------------------------------------------------------------------------------------------------------------------------------------------------------------------------------------------------------------------------------------------------------------------------------|
|                              | <a href="https://www.governing.com/topics/health-human-services/gov-medicaid-work-trump-drug-testing-kentucky.html">https://www.governing.com/topics/health-human-services/gov-medicaid-work-trump-drug-testing-kentucky.html</a>                                                                                                                                                                                                                                                                                                                                                                                                                                                                             |
| <b>Brownback (KS-R) 2017</b> | Governor’s administration admits a small number of people will be affected but that it will improve their lives. A KanCare spokeswoman stated, “We think it does people good to get encouragement and help getting a job. We think that’s good for people, it’s good for how they feel about themselves, it’s good for their quality of life.”<br><a href="https://www.kansas.com/news/politics-government/article181286581.html">https://www.kansas.com/news/politics-government/article181286581.html</a>                                                                                                                                                                                                   |
| <b>Colyer (KS-R) 2018</b>    | The Wichita Eagle reported if Colyer remains Governor, he will move forward with work requirements despite a federal judge recently blocking the Kentucky plan for work requirements. Colyer’s response was, “We understand the concerns that are in Kentucky. I disagree with that court decision but I think there’s an opportunity for us.”<br><a href="https://www.governing.com/topics/health-human-services/gov-medicaid-work-trump-drug-testing-kentucky.html">https://www.governing.com/topics/health-human-services/gov-medicaid-work-trump-drug-testing-kentucky.html</a>                                                                                                                           |
| <b>Bevin (KY-R) 2016</b>     | Bevin proposed to Medicaid recipients would lose dental and vision coverage unless they won “reward points” for community service such as picking up trash to earn having a tooth pulled or other tasks. Bevin’s deputy chief of staff stated that if Medicaid recipients completed a detailed, personal health questionnaire they would earn “enough to pay for three fillings and a tooth extraction.” Bevin’s plan was to file a waiver that would focus on “roughly 400,000 ‘able-bodied’ adults enrolled in Medicaid.”<br><a href="https://www.kentucky.com/news/politics-government/article86731887.html">https://www.kentucky.com/news/politics-government/article86731887.html</a>                    |
| <b>Bevin (KY-R) 2018</b>     | In an interview shortly after KY was awarded the first waiver for work requirements, Bevin say “it will be transformational”. He continued to say, “This idea that somehow we are punishing people, that this will be a detriment to people I think is a huge misunderstanding of what people need.” He noted he came from a low-income family.<br><a href="https://www.governing.com/topics/health-human-services/gov-medicaid-work-trump-drug-testing-kentucky.html">https://www.governing.com/topics/health-human-services/gov-medicaid-work-trump-drug-testing-kentucky.html</a>                                                                                                                          |
| <b>Edwards (LA-D) 2018</b>   | “For those who are not currently working but are able and eligible to work, we must find reasonable ways to ensure they, too, benefit for the dignity of being employed.” Edwards revealed in a letter to a state legislator that his administration had started working on a waiver in 2017 that included work requirements and had a meeting scheduled with CMS to discuss it. In April 2019, Edwards announced LA would not pursue work requirements due to Court decisions about other states, but would watch and see what happens.<br><a href="https://www.nola.com/politics/2018/01/medicaid_work_requirements_lou.html">https://www.nola.com/politics/2018/01/medicaid_work_requirements_lou.html</a> |

|                                 |                                                                                                                                                                                                                                                                                                                                                                                                                                                                                                                                                                                                                                                                                                       |
|---------------------------------|-------------------------------------------------------------------------------------------------------------------------------------------------------------------------------------------------------------------------------------------------------------------------------------------------------------------------------------------------------------------------------------------------------------------------------------------------------------------------------------------------------------------------------------------------------------------------------------------------------------------------------------------------------------------------------------------------------|
| <b>LePage (ME-R)<br/>2017</b>   | <p>Waiver request to charge premiums and copays, work requirements, and an asset test. Strict rules to knock people off Medicaid if they miss payments or do not meet work requirements.</p> <p><a href="https://www.pressherald.com/2017/01/26/maine-dhhs-wants-to-charge-some-mainecare-recipients-premiums-fees/">https://www.pressherald.com/2017/01/26/maine-dhhs-wants-to-charge-some-mainecare-recipients-premiums-fees/</a></p>                                                                                                                                                                                                                                                               |
| <b>LePage (ME-R)<br/>2018</b>   | <p>“These work-oriented activities end isolation, build relationships, improve quality of life and help move our economy forward.”</p> <p><a href="https://www.governing.com/topics/health-human-services/gov-medicaid-work-trump-drug-testing-kentucky.html">https://www.governing.com/topics/health-human-services/gov-medicaid-work-trump-drug-testing-kentucky.html</a></p>                                                                                                                                                                                                                                                                                                                       |
| <b>Snyder (MI-R)<br/>2018</b>   | <p>“The Healthy Michigan Plan has been a success story that can be a model for the entire country on how to assist people in leading healthier lives.”</p> <p><a href="https://www.mlive.com/news/2018/06/medicaid_work_requirements_sig.html">https://www.mlive.com/news/2018/06/medicaid_work_requirements_sig.html</a></p>                                                                                                                                                                                                                                                                                                                                                                         |
| <b>Bryant (MS-R)<br/>2017</b>   | <p>In a directive to move enrollment and eligibility to the Dept. of Human Services, Bryant also instructed them to include the steps to transfer . . . “all waiver authority related to Medicaid enrollment and eligibility, including any work requirements related to eligibility.”</p> <p><a href="https://www.clarionledger.com/story/news/politics/2017/10/26/medicaid-eligibility-under-human-services-alludes-work-requirement-under-bryant-plan/803152001/">https://www.clarionledger.com/story/news/politics/2017/10/26/medicaid-eligibility-under-human-services-alludes-work-requirement-under-bryant-plan/803152001/</a></p>                                                             |
| <b>Bryant (MS-R)<br/>2018</b>   | <p>State Medicaid spokesman stated, “This is an effort to give this small group of able-bodied adults some additional tools to assist them in their search for employment and self-sufficiency.”</p> <p><a href="https://www.governing.com/topics/health-human-services/gov-medicaid-work-trump-drug-testing-kentucky.html">https://www.governing.com/topics/health-human-services/gov-medicaid-work-trump-drug-testing-kentucky.html</a></p>                                                                                                                                                                                                                                                         |
| <b>Greitens (MO-R)<br/>2018</b> | <p>State legislators asked acting Director of Department of Social Services if they were exploring work requirements. He stated they were and added, “It’s reasonable to ask somebody to do something to receive something back. If people are able to work, then we ought to be helping them get opportunities to work and sustain employment.”</p> <p><a href="https://www.stltoday.com/news/local/govt-and-politics/missouri-is-looking-at-work-requirements-for-medicaid/article_f00eb216-526f-5bad-8239-d828b223e8c1.html">https://www.stltoday.com/news/local/govt-and-politics/missouri-is-looking-at-work-requirements-for-medicaid/article_f00eb216-526f-5bad-8239-d828b223e8c1.html</a></p> |
| <b>Ricketts (NE-R)<br/>2019</b> | <p>The waiver plan ultimately included two tiers of coverage for the expansion population. The Nebraska Star Tribune reported the two tiers were “a ‘basic’ plan for all newly qualified recipients, and ‘premium’ coverage that’s only available to people who are working, in school, volunteering or caring for a relative. The premium plan would cover dental and vision appointments and over-the-counter drugs.”</p> <p><a href="https://www.citylab.com/equity/2019/02/ballot-initiatives-blue-wave-election-vote-utah-maine-idaho/582223/">https://www.citylab.com/equity/2019/02/ballot-initiatives-blue-wave-election-vote-utah-maine-idaho/582223/</a></p>                                |

|                                    |                                                                                                                                                                                                                                                                                                                                                                                                                                                                                                                                                                     |
|------------------------------------|---------------------------------------------------------------------------------------------------------------------------------------------------------------------------------------------------------------------------------------------------------------------------------------------------------------------------------------------------------------------------------------------------------------------------------------------------------------------------------------------------------------------------------------------------------------------|
| <p><b>Hassan (NH-D) 2016</b></p>   | <p>The state requested work requirements in a waiver to the federal government that those who were eligible to have to work, be in training for a job, or be actively searching for work or other work-related activities for 30 hours per week. The waiver was denied.</p> <p><a href="https://www.nhpr.org/post/hassan-signs-nhs-expanded-medicaid-program-law-until-2018#stream/0">https://www.nhpr.org/post/hassan-signs-nhs-expanded-medicaid-program-law-until-2018#stream/0</a></p>                                                                          |
| <p><b>Sununu (NH-R) 2018</b></p>   | <p>“It will allow states to control the costs of their Medicaid programs by helping more people enter the workforce.”</p> <p><a href="https://www.governing.com/topics/health-human-services/gov-medicaid-work-trump-drug-testing-kentucky.html">https://www.governing.com/topics/health-human-services/gov-medicaid-work-trump-drug-testing-kentucky.html</a></p>                                                                                                                                                                                                  |
| <p><b>Cooper (NC-D) 2018</b></p>   | <p>The waiver states, “Carolina Cares enrollees would be required to be employed or engaged in activities to promote employment.” A governor spokesman stated, “Some state House Republicans support increased access to Medicaid with a work requirement, and although the Governor has serious concerns about that, he’s pleased that there is some movement on this.”</p> <p><a href="https://www.wral.com/cooper-and-trump-together-on-medicaid-not-so-fast/17250785/">https://www.wral.com/cooper-and-trump-together-on-medicaid-not-so-fast/17250785/</a></p> |
| <p><b>Kasich (OH-R) 2018</b></p>   | <p>Stated he is fine with work requirements, though noted they wouldn’t affect many recipients.</p> <p><a href="https://www.daytondailynews.com/news/should-medicaid-come-with-work-requirements-ohio-says-yes/b4Rd1ETEW4h0wGfa6eOwhJ/">https://www.daytondailynews.com/news/should-medicaid-come-with-work-requirements-ohio-says-yes/b4Rd1ETEW4h0wGfa6eOwhJ/</a></p>                                                                                                                                                                                              |
| <p><b>Fallin (OK-R) 2018</b></p>   | <p>Fallin signed an executive order for the state Medicaid agency to seek a waiver to allow it to add work requirements. She issued a news release with her executive order that stated, “a work requirement would encourage recipients to reach economic independence.”</p> <p><a href="https://newsok.com/article/5586001/fallin-orders-medicaid-work-requirement-details-unclear">https://newsok.com/article/5586001/fallin-orders-medicaid-work-requirement-details-unclear</a></p>                                                                             |
| <p><b>Corbett (PA-R) 2014</b></p>  | <p>Initial plan for waiver was “beneficiaries would have to either be working, actively searching for work, or engaged in job training to qualify for enrollment” in expanded Medicaid. Governor realized this would not be approved, so modified to charging different premiums if beneficiary was working or actively looking for work. This also was not approved.</p> <p><a href="https://www.miamiherald.com/news/health-care/article18725061.html">https://www.miamiherald.com/news/health-care/article18725061.html</a></p>                                  |
| <p><b>McMaster (SC-R) 2018</b></p> | <p>“Whenever possible, we should always endeavor to help South Carolinians in need find their path to gainful employment and away from the temporary assistance of government.”</p> <p><a href="https://www.postandcourier.com/health/south-carolina-wants-to-impose-work-requirements-on-medicaid-beneficiaries/article_f3ea7be0-f6f3-11e7-99ba-676672dbc0de.html">https://www.postandcourier.com/health/south-carolina-wants-to-impose-work-requirements-on-medicaid-beneficiaries/article_f3ea7be0-f6f3-11e7-99ba-676672dbc0de.html</a></p>                      |

|                                 |                                                                                                                                                                                                                                                                                                                                                                                                                                                                                                                                                                                                                |
|---------------------------------|----------------------------------------------------------------------------------------------------------------------------------------------------------------------------------------------------------------------------------------------------------------------------------------------------------------------------------------------------------------------------------------------------------------------------------------------------------------------------------------------------------------------------------------------------------------------------------------------------------------|
| <b>Daugaard (SD-R)<br/>2018</b> | <p>In his State of the State address he announced the state would seek a waiver for work requirements. “Work is an important part of personal fulfillment. There’s a sense of pride that comes with having a job to do and being able to provide for your family.”</p> <p><a href="https://www.argusleader.com/story/news/politics/2018/01/09/gov-daugaard-see-work-requirement-medicaid-recipients/1015099001/">https://www.argusleader.com/story/news/politics/2018/01/09/gov-daugaard-see-work-requirement-medicaid-recipients/1015099001/</a></p>                                                          |
| <b>Haslam (TN-R)<br/>2018</b>   | <p>Haslam stated he hoped work requirements would enable support for Medicaid expansion, but it was not included in the bill. Regarding work requirements, the Governor said, “We have thousands of unmet job needs in Tennessee right now. So this is an environment where people can go fairly easily and meet those qualifications.”</p> <p><a href="https://thinkprogress.org/tennessee-governor-to-sign-medicaid-work-requirement-funded-by-welfare-dollars-429e772191e5/">https://thinkprogress.org/tennessee-governor-to-sign-medicaid-work-requirement-funded-by-welfare-dollars-429e772191e5/</a></p> |
| <b>Herbert (UT-R)<br/>2014</b>  | <p>“If you want the taxpayers to fund your health care, then you need to go out and be involved in a work program, no ifs, ands or buts.” Stated the Obama administration has accused him of trying to turn Medicaid into a work program and his response is, “You’re right.”</p> <p><a href="https://archive.sltrib.com/article.php?id=1903363&amp;itype=cmsid">https://archive.sltrib.com/article.php?id=1903363&amp;itype=cmsid</a></p>                                                                                                                                                                     |
| <b>Herbert (UT-R)<br/>2018</b>  | <p>He stated, . . . “We’re gonna help people get off of government assistance and have a better life. It’s a win win win all the way around. So I hope this legislation passes.” Signed a bill to send a waiver request to partially expand Medicaid that includes work requirements.</p> <p><a href="https://www.governing.com/topics/health-human-services/gov-medicaid-work-trump-drug-testing-kentucky.html">https://www.governing.com/topics/health-human-services/gov-medicaid-work-trump-drug-testing-kentucky.html</a></p>                                                                             |
| <b>Northam (VA-D)<br/>2018</b>  | <p>Regarding the work requirements, the Governor said he preferred a “carrot approach rather than a stick approach” and “We want to make sure we help people get back into the workforce but not penalize them.”</p> <p><a href="https://khn.org/news/despite-u-s-courts-ruling-medicaid-work-requirements-advance-in-other-states/">https://khn.org/news/despite-u-s-courts-ruling-medicaid-work-requirements-advance-in-other-states/</a></p>                                                                                                                                                                |
| <b>Justice (WV-R)<br/>2018</b>  | <p>A spokesman for the Dept. of Health and Human Resources stated, “We’re really trying to empower folks to get out of the system.” “DHHR want to ‘align’ Medicaid with other programs, such as food stamps and unemployment programs that already have work requirements.”</p> <p><a href="https://www.washingtonexaminer.com/nine-states-ready-to-require-jobs-for-medicaid-enrollees">https://www.washingtonexaminer.com/nine-states-ready-to-require-jobs-for-medicaid-enrollees</a></p>                                                                                                                   |
| <b>Justice (WV-R)<br/>2019</b>  | <p>The Director for Medicaid Services suggested the work requirements may only focus on those who qualified for Medicaid under the expansion program.</p> <p><a href="http://wvmetronews.com/2019/02/20/w-va-house-may-pursue-work-requirements-for-medicaid/">http://wvmetronews.com/2019/02/20/w-va-house-may-pursue-work-requirements-for-medicaid/</a></p>                                                                                                                                                                                                                                                 |

|                               |                                                                                                                                                                                                                                                                                                                                                                                                                                                                                                                                                                                                                                                                                                             |
|-------------------------------|-------------------------------------------------------------------------------------------------------------------------------------------------------------------------------------------------------------------------------------------------------------------------------------------------------------------------------------------------------------------------------------------------------------------------------------------------------------------------------------------------------------------------------------------------------------------------------------------------------------------------------------------------------------------------------------------------------------|
| <b>Walker (WI-R)<br/>2018</b> | The waiver requested a 4-year time limit on Medicaid for childless adults who do not work or engage in job training. Walker said the proposed change in the program “is about helping people transition from public assistance into Wisconsin’s workforce, where they can build a solid financial foundation for themselves and their families.”<br><a href="https://madison.com/wsj/news/local/govt-and-politics/trump-work-requirement-rewrites-health-care-rules-for-poor-in/article_59280293-3abf-5c01-ab2a-eb77b9394efd.html">https://madison.com/wsj/news/local/govt-and-politics/trump-work-requirement-rewrites-health-care-rules-for-poor-in/article_59280293-3abf-5c01-ab2a-eb77b9394efd.html</a> |
|-------------------------------|-------------------------------------------------------------------------------------------------------------------------------------------------------------------------------------------------------------------------------------------------------------------------------------------------------------------------------------------------------------------------------------------------------------------------------------------------------------------------------------------------------------------------------------------------------------------------------------------------------------------------------------------------------------------------------------------------------------|

Source: Collected by authors through Google News searches.

### Table A-3. CCES Items Used for Analyses Presented in Tables 1 and 2

#### Governor/Legislature Approval:

“Do you approve of the way each is doing their job...The Governor of \_\_\_\_\_”

(1=strongly disapprove, 2=disapprove, 3=not sure, 4=approve, 5=strongly approve; recoded from original scale)

#### Support for Medicaid Expansion:

“Should your state refuse to implement the expansion of health care for poor people, even if it costs the state federal Medicaid funds?”

1 Yes

2 No

#### Economic Evaluation:

OVER THE PAST YEAR the nation's economy has ...?

(1=gotten much better, 2=gotten better, 3=stayed about the same, 4=gotten worse, 5=gotten much worse)

#### Personal Economic Evaluation:

“OVER THE PAST FOUR YEARS has your household's income ...?”

1 Increased A Lot

2 Increased Somewhat

3 Stayed about the same

4 Decreased Somewhat

5 Decreased A Lot

#### Liberal-Conservative: Self-Placement (Pre-election):

1=Extremely Liberal 2=Liberal, 3=Somewhat Liberal, 4=Moderate, 5=Somewhat Conservative, 6=Conservative, 7=Extremely Conservative

#### Party Identification Self-Placement (Pre-election):

1=Strong Democrat, 2=Not Very Strong Democrat, 3=Lean Democrat, 4=Independent, 5=Lean Republican, 6=Not Very Strong Republican, 7=Strong Republican

#### Gender:

0=male, 1=female

#### Education:

<1> Did not graduate from High School

<2> High school graduate

<3> Some college, but no degree (yet)

<4> 2-year college degree

<5> 4-year college degree

<6> Post-graduate degree (MA, MBA, MD, JD, PhD, etc.)

#### Family Income:

(Coded as a dichotomous variable in Table 2 analysis based on the categories below: 1-5=1, 6-14=0)

“Thinking back over the last year, what was your family’s annual income?”

<1> less than \$10,000

<2> \$10,000-\$14,999

<3> \$15,000-\$19,999

<4> \$20,000-\$24,999

<5> \$25,000-\$29,999

<6> \$30,000-\$39,999

<7> \$40,000-\$49,999

<8> \$50,000-\$59,999

<9> \$60,000-\$69,999

<10> \$70,000-\$79,999

<11> \$80,000-\$99,999

<12> \$100,000-\$119,999

<13> \$120,000-\$149,999

<14> \$150,000 or more

**Table A-4. Measurement of Variables Used for Analysis in Table 3**

| <b>Table 3 Variables</b>              | <b>Definition</b>                                                                 |
|---------------------------------------|-----------------------------------------------------------------------------------|
| Governor Support for Work Requirement | 0=not supported<br>1=public support                                               |
| Medicaid Expansion                    | 1=expansion state<br>0=non-expansion state<br>(Kaiser Family Foundation)          |
| Republican Governor                   | 1=Republican governor<br>0=Democrat governor<br>(authors)                         |
| Gubernatorial Approval                | Mean Approval Rating of governor (from CCES)                                      |
| Republican Legislature                | 1=Republican majority in state legislature<br>0=otherwise<br>(Authors)            |
| Partyid of state                      | Mean strength of Republican party identification (CCES)                           |
| Hospitals Per capita                  | Number of hospitals per 100,000 state population (Kaiser Family Foundation)       |
| Medicaid recipients                   | Proportion of state population enrolled in Medicaid<br>(Kaiser Family Foundation) |
| State tax collections per capita      | State tax collections per state resident, in \$1000s (Census Bureau)              |
| Unemployment Rate                     | Official state unemployment rate (annual average)<br>(Bureau of Labor Statistics) |

**Table A-5. Full Results for Table 1**

|                                                         | (1)                      | (2)                         |
|---------------------------------------------------------|--------------------------|-----------------------------|
| <b>Independent Variables</b>                            | <b>Governor Approval</b> | <b>Legislature Approval</b> |
|                                                         |                          |                             |
| Oppose Expansion<br>(Non-Expansion State)               | 1.004**<br>[0.247]       | 0.959**<br>[0.168]          |
|                                                         |                          |                             |
| Oppose Expansion<br>(Expansion State)                   | -1.470**<br>[0.375]      | -1.335**<br>[0.228]         |
|                                                         |                          |                             |
| partyid                                                 | 0.0577<br>[0.0397]       | 0.0275<br>[0.0268]          |
|                                                         |                          |                             |
| ideology                                                | 0.0362<br>[0.0267]       | 0.0518*<br>[0.0230]         |
|                                                         |                          |                             |
| Legislature spending -<br>Welfare                       | -0.0446<br>[0.0262]      | -0.0652*<br>[0.0265]        |
|                                                         |                          |                             |
| Legislature spending -<br>Education                     | 0.0418<br>[0.0357]       | 0.0396<br>[0.0301]          |
|                                                         |                          |                             |
| Legislature spending - Law<br>Enforcement               | -0.0884**<br>[0.0260]    | -0.101**<br>[0.0270]        |
|                                                         |                          |                             |
| Legislature spending -<br>Transportation/Infrastructure | -0.0191<br>[0.0156]      | 0.0123<br>[0.0133]          |
|                                                         |                          |                             |
| Personal Economic<br>Evaluation                         |                          |                             |
| econ_lastyr=1                                           | 0 [.]                    | 0 [.]                       |
|                                                         |                          |                             |
| econ_lastyr=2                                           | -0.0990<br>[0.0579]      | -0.117<br>[0.0831]          |
|                                                         |                          |                             |
| econ_lastyr=3                                           | -0.226*<br>[0.0995]      | -0.171<br>[0.121]           |
|                                                         |                          |                             |
| econ_lastyr=4                                           | -0.350*<br>[0.132]       | -0.310*<br>[0.138]          |
|                                                         |                          |                             |
| econ_lastyr=5                                           | -0.552**<br>[0.146]      | -0.495**<br>[0.134]         |
|                                                         |                          |                             |

|                             |                         |                          |
|-----------------------------|-------------------------|--------------------------|
| econ_lastyr=6               | -0.263*<br>[0.124]      | -0.174<br>[0.152]        |
| National Economy Evaluation |                         |                          |
| 1. Increased a lot          | 0 [.]                   | 0 [.]                    |
| 2. Increased somewhat       | -0.110*<br>[0.0437]     | -0.0776*<br>[0.0311]     |
| 3. Stayed about the same    | -0.162**<br>[0.0417]    | -0.117**<br>[0.0299]     |
| 4. Decreased somewhat       | -0.222**<br>[0.0461]    | -0.167**<br>[0.0345]     |
| 5. Decreased a lot          | -0.290**<br>[0.0475]    | -0.277**<br>[0.0307]     |
| unemployed                  | -0.0182<br>[0.0282]     | 0.0203<br>[0.0261]       |
| Religion                    |                         |                          |
| Baseline=Protestant         | ---                     | ---                      |
| =Roman Catholic             | 0.0427<br>[0.0345]      | -0.0124<br>[0.0265]      |
| =Jewish                     | -0.0162<br>[0.0717]     | -0.0500<br>[0.0611]      |
| =Something else             | -0.0181<br>[0.0372]     | -0.0486<br>[0.0297]      |
| =nothing                    | -0.0674*<br>[0.0334]    | -0.129**<br>[0.0241]     |
| Family income               | -0.000177<br>[0.000292] | -0.000304<br>[0.000241]  |
| age                         | -0.000717<br>[0.00121]  | -0.00594**<br>[0.000924] |
| Education Level             |                         |                          |
| 1. No HS                    | 0 [.]                   | 0 [.]                    |
| 2. High school graduate     | 0.0561<br>[0.0455]      | 0.0612<br>[0.0454]       |

|                                  |                       |                      |
|----------------------------------|-----------------------|----------------------|
| 3. Some college                  | 0.0635<br>[0.0475]    | 0.0369<br>[0.0463]   |
|                                  |                       |                      |
| 4. 2-year                        | 0.0310<br>[0.0466]    | 0.0117<br>[0.0453]   |
|                                  |                       |                      |
| 5. 4-year                        | 0.0793<br>[0.0418]    | 0.0468<br>[0.0441]   |
|                                  |                       |                      |
| 6. Post-grad                     | 0.0280<br>[0.0484]    | -0.0584<br>[0.0492]  |
|                                  |                       |                      |
| Gender                           | 0.0279<br>[0.0219]    | 0.0853**<br>[0.0199] |
|                                  |                       |                      |
| Health insurance - Thru employer | 0.0236<br>[0.0229]    | 0.0237<br>[0.0159]   |
|                                  |                       |                      |
| Health insurance - Govt program  | -0.0840**<br>[0.0206] | -0.108**<br>[0.0167] |
|                                  |                       |                      |
| state=1                          | 0 [.]                 | 0 [.]                |
|                                  |                       |                      |
| state=2                          | -0.539**<br>[0.0230]  | 0.00998<br>[0.0180]  |
|                                  |                       |                      |
| state=3                          | 0.460**<br>[0.154]    | 0.345**<br>[0.0882]  |
|                                  |                       |                      |
| state=4                          | 0.800**<br>[0.147]    | 0.634**<br>[0.0817]  |
|                                  |                       |                      |
| state=5                          | 0.571**<br>[0.139]    | 0.423**<br>[0.0636]  |
|                                  |                       |                      |
| state=6                          | 0.199<br>[0.154]      | 0.328**<br>[0.0856]  |
|                                  |                       |                      |
| state=7                          | -0.0271<br>[0.140]    | 0.242**<br>[0.0704]  |
|                                  |                       |                      |
| state=8                          | 0.512**<br>[0.142]    | 0.659**<br>[0.0717]  |
|                                  |                       |                      |
| state=9                          | -0.550**<br>[0.0392]  | -0.152**<br>[0.0262] |
|                                  |                       |                      |

|          |                       |                        |
|----------|-----------------------|------------------------|
| state=10 | -0.399**<br>[0.0335]  | -0.0668**<br>[0.0226]  |
|          |                       |                        |
| state=11 | 0.115<br>[0.142]      | 0.453**<br>[0.0683]    |
|          |                       |                        |
| state=12 | -0.453**<br>[0.0182]  | -0.0580**<br>[0.0120]  |
|          |                       |                        |
| state=13 | -0.166<br>[0.139]     | -0.0947<br>[0.0654]    |
|          |                       |                        |
| state=14 | -0.132**<br>[0.0285]  | 0.0634**<br>[0.0140]   |
|          |                       |                        |
| state=15 | 0.662**<br>[0.149]    | 0.838**<br>[0.0831]    |
|          |                       |                        |
| state=16 | -0.690**<br>[0.0350]  | -0.345**<br>[0.0261]   |
|          |                       |                        |
| state=17 | 0.519**<br>[0.142]    | 0.499**<br>[0.0789]    |
|          |                       |                        |
| state=18 | -0.470**<br>[0.0146]  | -0.0989**<br>[0.00966] |
|          |                       |                        |
| state=19 | -0.559**<br>[0.0398]  | -0.0338<br>[0.0254]    |
|          |                       |                        |
| state=20 | 0.0828<br>[0.136]     | 0.359**<br>[0.0627]    |
|          |                       |                        |
| state=21 | 0.451**<br>[0.134]    | 0.548**<br>[0.0583]    |
|          |                       |                        |
| state=22 | 0.205<br>[0.138]      | 0.301**<br>[0.0682]    |
|          |                       |                        |
| state=23 | 0.596**<br>[0.140]    | 0.662**<br>[0.0695]    |
|          |                       |                        |
| state=24 | -0.228**<br>[0.00787] | -0.0314**<br>[0.00607] |
|          |                       |                        |
| state=25 | -0.384**<br>[0.0296]  | -0.165**<br>[0.0168]   |
|          |                       |                        |

|          |                        |                        |
|----------|------------------------|------------------------|
| state=26 | 0.232**<br>[0.0193]    | 0.105**<br>[0.0130]    |
|          |                        |                        |
| state=27 | -0.0353*<br>[0.0143]   | 0.289**<br>[0.0111]    |
|          |                        |                        |
| state=28 | 0.980**<br>[0.148]     | 0.737**<br>[0.0756]    |
|          |                        |                        |
| state=29 | 0.586**<br>[0.141]     | 0.679**<br>[0.0733]    |
|          |                        |                        |
| state=30 | 0.180<br>[0.140]       | 0.390**<br>[0.0676]    |
|          |                        |                        |
| state=31 | 0.508**<br>[0.145]     | 0.339**<br>[0.0743]    |
|          |                        |                        |
| state=32 | 0.444**<br>[0.140]     | 0.361**<br>[0.0643]    |
|          |                        |                        |
| state=33 | -0.452**<br>[0.0373]   | -0.264**<br>[0.0219]   |
|          |                        |                        |
| state=34 | 0.653**<br>[0.161]     | 0.580**<br>[0.0901]    |
|          |                        |                        |
| state=35 | 0.554**<br>[0.141]     | 0.555**<br>[0.0736]    |
|          |                        |                        |
| state=36 | -0.457**<br>[0.0173]   | -0.0884**<br>[0.0167]  |
|          |                        |                        |
| state=37 | 0.321*<br>[0.133]      | 0.547**<br>[0.0615]    |
|          |                        |                        |
| state=38 | -0.158<br>[0.142]      | 0.225**<br>[0.0746]    |
|          |                        |                        |
| state=39 | -0.139<br>[0.129]      | -0.190**<br>[0.0551]   |
|          |                        |                        |
| state=40 | -0.0530**<br>[0.00762] | -0.0239**<br>[0.00487] |
|          |                        |                        |
| state=41 | 0.110**<br>[0.0136]    | 0.116**<br>[0.00885]   |
|          |                        |                        |

|                     |                       |                       |
|---------------------|-----------------------|-----------------------|
| state=42            | -0.0519**<br>[0.0130] | 0.0884**<br>[0.00696] |
| state=43            | -0.250**<br>[0.0203]  | 0.0528**<br>[0.0153]  |
| state=44            | -0.00413<br>[0.0246]  | -0.0953**<br>[0.0177] |
| state=45            | 0.546**<br>[0.133]    | 0.864**<br>[0.0587]   |
| state=46            | -0.327**<br>[0.0269]  | -0.0857**<br>[0.0189] |
| state=47            | 0.447**<br>[0.135]    | 0.342**<br>[0.0616]   |
| state=48            | 0.600**<br>[0.149]    | 0.518**<br>[0.0868]   |
| state=49            | -0.245**<br>[0.0368]  | -0.0209<br>[0.0205]   |
| state=50            | -0.0374<br>[0.0550]   | 0.262**<br>[0.0388]   |
| <b>Constant</b>     | 3.199**<br>[0.342]    | 3.196**<br>[0.304]    |
| <b>Observations</b> | 43106                 | 43090                 |

Note: Standard errors in brackets

\* p<0.05

\*\* p<0.01

**Table A-6. Full Results for Analysis Presented in Table 2**  
(Slope Coefficients and Standard Errors)

|                              | -1                       | -2                          |
|------------------------------|--------------------------|-----------------------------|
| <b>Independent Variables</b> | <b>Governor Approval</b> | <b>Legislature Approval</b> |
| Expansion                    | 0.536**                  | 0.302**                     |
|                              | -0.0341                  | -0.0302                     |
| Expansion#PartyID            | -0.0616**                | -0.0319**                   |
|                              | -0.00559                 | -0.00486                    |
| Expansion#Ideology           | -0.0673**                | -0.0312**                   |
|                              | -0.00694                 | -0.00617                    |
| PartyID                      | 0.0246**                 | 0.00419                     |
|                              | -0.00304                 | -0.00262                    |
| Ideology                     | 0.0270**                 | 0.0310**                    |
|                              | -0.00397                 | -0.00348                    |
| Economic Evaluation          |                          |                             |
| 2.econ_lastyr                | -0.205**                 | -0.140**                    |
|                              | -0.0318                  | -0.0285                     |
| 3.econ_lastyr                | -0.232**                 | -0.115**                    |
|                              | -0.0316                  | -0.0282                     |
| 4.econ_lastyr                | -0.344**                 | -0.209**                    |
|                              | -0.032                   | -0.0286                     |
| 5.econ_lastyr                | -0.444**                 | -0.315**                    |
|                              | -0.0332                  | -0.0295                     |
| 6.econ_lastyr                | -0.0647                  | 0.0975                      |
|                              | -0.061                   | -0.0535                     |
| Family Income                | -0.0217                  | 0.0387**                    |
|                              | -0.0112                  | -0.00979                    |
| Age                          | -0.000205                | -0.00290**                  |
|                              | -0.000289                | -0.000251                   |
| Gender                       | 0.0269**                 | 0.0987**                    |
|                              | -0.00924                 | -0.00803                    |
| Education Level              |                          |                             |
| 2.educ                       | 0.012                    | 0.0142                      |
|                              | -0.0246                  | -0.0211                     |
| 3.educ                       | -0.00587                 | -0.0333                     |
|                              | -0.0247                  | -0.0211                     |

|                  |          |           |
|------------------|----------|-----------|
| 4.educ           | -0.0487  | -0.0631** |
|                  | -0.027   | -0.0232   |
| 5.educ           | 0.0239   | -0.0571** |
|                  | -0.025   | -0.0214   |
| 6.educ           | -0.0018  | -0.135**  |
|                  | -0.0265  | -0.0227   |
| 2010.year        | -0.594** | -0.400**  |
|                  | -0.0165  | -0.0142   |
| 2012.year        | -0.460** | -0.248**  |
|                  | -0.0237  | -0.0206   |
| 2014.year        | -0.543** | -0.285**  |
|                  | -0.0286  | -0.0249   |
| 2016.year        | -0.498** | -0.218**  |
|                  | -0.0295  | -0.0256   |
| Governor Effects |          |           |
| 2.govcode        | -0.875** | -0.713**  |
|                  | -0.0399  | -0.0354   |
| 3.govcode        | 0.183    | 0.0938    |
|                  | -0.0989  | -0.0818   |
| 5.govcode        | -0.518** | -0.0818   |
|                  | -0.05    | -0.045    |
| 6.govcode        | 0.159**  | 0.174**   |
|                  | -0.0481  | -0.0455   |
| 8.govcode        | -0.413** | 0.0938    |
|                  | -0.0649  | -0.0582   |
|                  |          |           |
| 9.govcode        | -0.529*  | -0.0731   |
|                  | -0.226   | -0.217    |
| 10.govcode       | 0.129    | 0.383**   |
|                  | -0.0736  | -0.0661   |
| 11.govcode       | -0.314** | -0.316**  |
|                  | -0.0714  | -0.0615   |
| 13.govcode       | 0.0003   | 0.159*    |
|                  | -0.0788  | -0.073    |
| 14.govcode       | 0.105    | 0.0789    |
|                  | -0.0552  | -0.0498   |
| 15.govcode       | 0.191*   | 0.253**   |
|                  | -0.0848  | -0.0826   |
| 16.govcode       | -0.565** | -0.152**  |

|            |          |          |
|------------|----------|----------|
|            | -0.0571  | -0.0488  |
| 18.govcode | -0.0966  | 0.273**  |
|            | -0.0605  | -0.0555  |
| 22.govcode | 0.418**  | 0.189**  |
|            | -0.0573  | -0.062   |
| 23.govcode | -0.229** | -0.0465  |
|            | -0.0414  | -0.0367  |
| 24.govcode | -0.490** | -0.0215  |
|            | -0.074   | -0.0623  |
| 26.govcode | -0.456** | -0.0684* |
|            | -0.0397  | -0.0331  |
| 27.govcode | -0.438** | -0.0311  |
|            | -0.047   | -0.0412  |
| 29.govcode | -0.583** | -0.00465 |
|            | -0.055   | -0.0472  |
| 32.govcode | 0.277*   | 0.689**  |
|            | -0.137   | -0.145   |
| 33.govcode | 0.200**  | 0.318**  |
|            | -0.0626  | -0.0614  |
| 34.govcode | -0.355** | 0.172    |
|            | -0.126   | -0.136   |
| 35.govcode | -0.468** | -0.504** |
|            | -0.0448  | -0.0398  |
| 36.govcode | 0.393**  | 0.409**  |
|            | -0.0931  | -0.0941  |
| 37.govcode | -0.231** | 0.0404   |
|            | -0.0447  | -0.0395  |
| 38.govcode | -0.564** | -0.617** |
|            | -0.118   | -0.114   |
| 40.govcode | -0.136*  | 0.072    |
|            | -0.0637  | -0.0627  |
| 41.govcode | -0.0789  | 0.004    |
|            | -0.0689  | -0.0657  |
| 42.govcode | -0.496** | -0.140** |
|            | -0.0458  | -0.0382  |
| 44.govcode | 0.198**  | 0.214**  |
|            | -0.0532  | -0.0507  |
| 45.govcode | -0.139   | 0.02     |
|            | -0.126   | -0.111   |

|            |          |           |
|------------|----------|-----------|
| 46.govcode | 0.132**  | 0.212**   |
|            | -0.0508  | -0.0436   |
| 47.govcode | -0.108   | 0.0554    |
|            | -0.0972  | -0.0797   |
| 48.govcode | 0.421**  | 0.357**   |
|            | -0.0975  | -0.099    |
| 49.govcode | 0.262**  | 0.398**   |
|            | -0.0708  | -0.064    |
| 51.govcode | -0.169** | 0.00872   |
|            | -0.0488  | -0.0415   |
| 52.govcode | -0.394** | -0.164**  |
|            | -0.0831  | -0.0587   |
| 53.govcode | -0.130** | -0.0305   |
|            | -0.0423  | -0.0403   |
| 54.govcode | -0.186** | 0.0853*   |
|            | -0.0397  | -0.0362   |
| 55.govcode | -0.855** | -0.392**  |
|            | -0.0517  | -0.0435   |
| 56.govcode | -0.150** | -0.0750** |
|            | -0.0294  | -0.0263   |
| 57.govcode | -0.073   | 0.301**   |
|            | -0.136   | -0.114    |
| 58.govcode | -0.676** | -0.173**  |
|            | -0.0586  | -0.0517   |
| 59.govcode | -0.878** | -0.190**  |
|            | -0.0731  | -0.0645   |
| 61.govcode | 0.319**  | 0.352**   |
|            | -0.0895  | -0.0829   |
| 62.govcode | -0.763** | -0.353**  |
|            | -0.0948  | -0.0875   |
| 63.govcode | -0.00307 | 0.0662    |
|            | -0.109   | -0.103    |
| 64.govcode | -0.0803  | 0.0744    |
|            | -0.0474  | -0.0382   |
| 65.govcode | 0.570**  | 0.697**   |
|            | -0.145   | -0.14     |
| 66.govcode | -0.0811* | 0.0684*   |
|            | -0.0363  | -0.0318   |
| 67.govcode | -0.203** | 0.0869    |

|            |          |          |
|------------|----------|----------|
|            | -0.0541  | -0.0488  |
| 68.govcode | 0.109    | 0.128    |
|            | -0.0806  | -0.0728  |
| 69.govcode | -0.824** | -0.322** |
|            | -0.0825  | -0.0676  |
| 70.govcode | 0.323**  | 0.234**  |
|            | -0.0803  | -0.0883  |
| 71.govcode | -0.166*  | 0.0395   |
|            | -0.0797  | -0.0727  |
| 72.govcode | -0.615** | -0.0337  |
|            | -0.114   | -0.0825  |
| 73.govcode | 0.572**  | 0.123    |
|            | -0.0665  | -0.0653  |
| 74.govcode | -0.691** | -0.202*  |
|            | -0.111   | -0.0981  |
| 75.govcode | -0.321*  | -0.225   |
|            | -0.132   | -0.117   |
| 76.govcode | -0.0524  | -0.0904  |
|            | -0.0678  | -0.0549  |
| 77.govcode | -0.203*  | -0.0231  |
|            | -0.0867  | -0.0717  |
| 78.govcode | -0.0930* | 0.0209   |
|            | -0.0468  | -0.0416  |
| 79.govcode | -0.0499  | 0.103    |
|            | -0.0869  | -0.0864  |
| 80.govcode | -0.562** | -0.127*  |
|            | -0.0712  | -0.0618  |
| 82.govcode | -0.296** | 0.108**  |
|            | -0.0469  | -0.0419  |
| 83.govcode | -0.159*  | 0.156**  |
|            | -0.064   | -0.0563  |
| 84.govcode | -0.162   | 0.131    |
|            | -0.0871  | -0.0805  |
| 85.govcode | -0.733** | -0.0202  |
|            | -0.0755  | -0.0621  |
| 86.govcode | 0.404**  | 0.476**  |
|            | -0.109   | -0.129   |
| 87.govcode | 0.305**  | 0.380**  |
|            | -0.0593  | -0.0554  |

|             |          |          |
|-------------|----------|----------|
| 88.govcode  | -0.514** | -0.219** |
|             | -0.0714  | -0.0575  |
| 89.govcode  | -0.0801  | 0.0758   |
|             | -0.0562  | -0.0452  |
| 90.govcode  | -0.142   | 0.390**  |
|             | -0.139   | -0.119   |
| 91.govcode  | -0.094   | 0.126**  |
|             | -0.0514  | -0.0421  |
| 92.govcode  | -0.129** | 0.129**  |
|             | -0.0448  | -0.0406  |
| 93.govcode  | -0.299** | -0.0821  |
|             | -0.114   | -0.119   |
| 96.govcode  | -0.0519  | 0.182**  |
|             | -0.0644  | -0.0488  |
| 97.govcode  | -0.363** | -0.046   |
|             | -0.0532  | -0.0454  |
| 98.govcode  | -0.809** | -0.319** |
|             | -0.0369  | -0.034   |
| 100.govcode | -0.680** | 0.0279   |
|             | -0.0851  | -0.0652  |
| 101.govcode | 0.0395   | 0.157    |
|             | -0.0964  | -0.0992  |
| 102.govcode | -0.143   | 0.411**  |
|             | -0.117   | -0.0997  |
| 103.govcode | 0.074    | 0.255**  |
|             | -0.0614  | -0.0539  |
| 104.govcode | -0.0978  | 0.11     |
|             | -0.0848  | -0.0739  |
| 106.govcode | -0.0653  | 0.215**  |
|             | -0.0644  | -0.0516  |
| 108.govcode | -0.234** | 0.234**  |
|             | -0.0376  | -0.0332  |
| 109.govcode | -0.384** | 0.0579   |
|             | -0.0394  | -0.0338  |
| 110.govcode | -0.489** | -0.0307  |
|             | -0.0404  | -0.0339  |
| 111.govcode | -0.0315  | 0.170**  |
|             | -0.0673  | -0.0643  |
| 112.govcode | -0.1     | 0.0875   |

|             |          |          |
|-------------|----------|----------|
|             | -0.0596  | -0.0554  |
| 115.govcode | -1.433** | -0.493** |
|             | -0.0732  | -0.0566  |
| 116.govcode | -0.822** | 0.0794   |
|             | -0.17    | -0.122   |
| 117.govcode | -0.576** | -0.108   |
|             | -0.0639  | -0.0556  |
| 118.govcode | -0.0325  | 0.483**  |
|             | -0.231   | -0.163   |
| 119.govcode | -0.353** | 0.108*   |
|             | -0.0557  | -0.0444  |
| 120.govcode | -0.207   | 0.314*   |
|             | -0.167   | -0.138   |
| 121.govcode | -0.363** | 0.0443   |
|             | -0.0517  | -0.0459  |
| 122.govcode | -0.0999* | 0.00423  |
|             | -0.0471  | -0.0427  |
| 123.govcode | 0.112    | 0.204*   |
|             | -0.1     | -0.0963  |
| 124.govcode | -0.0629  | -0.159*  |
|             | -0.0856  | -0.07    |
| 125.govcode | -0.578** | -0.244** |
|             | -0.0672  | -0.0594  |
| 126.govcode | -0.373** | -0.0576  |
|             | -0.0467  | -0.0398  |
| 127.govcode | -0.107   | 0.138**  |
|             | -0.0602  | -0.0494  |
| 128.govcode | -0.163** | 0.101*   |
|             | -0.0472  | -0.0439  |
| 130.govcode | -0.225** | -0.0327  |
|             | -0.075   | -0.0593  |
| 131.govcode | -0.500** | -0.135*  |
|             | -0.0651  | -0.0553  |
| 132.govcode | -0.583** | -0.0556  |
|             | -0.0408  | -0.0356  |
| 133.govcode | -0.298** | -0.00721 |
|             | -0.0409  | -0.0363  |
| 134.govcode | -0.444** | -0.0354  |
|             | -0.102   | -0.0847  |

|                  |         |         |
|------------------|---------|---------|
| <b>Constant</b>  | 3.685** | 3.021** |
|                  | -0.0561 | -0.0497 |
|                  |         |         |
| <b>N</b>         | 223269  | 223048  |
| <b>adj. R-sq</b> | 0.053   | 0.046   |

Note: Standard errors in parentheses

\*  $p < 0.05$

\*\*  $p < 0.01$

**Table A-8. Descriptive Statistics for Variables Used in Analyses**

| <b>Variable</b>                            | <b>Mean</b> | <b>S.D.</b> |
|--------------------------------------------|-------------|-------------|
| <b>Table 1 Variables</b>                   |             |             |
| Governor Approval                          | 2.857626    | 1.466457    |
| Legislature Approval                       | 2.752129    | 1.284326    |
| Expansion Opposition (Non-Expansion State) | 0.3572008   | 0.479179    |
| Expansion Opposition (Expansion State)     | 0.1932111   | 0.3948207   |
| Partyid                                    | 2.645729    | 2.140565    |
| Ideology                                   | 4.194845    | 1.800217    |
| Welfare                                    | 3.26372     | 1.166432    |
| Health                                     | 2.186292    | 1.064511    |
| Education                                  | 2.536234    | 0.9339967   |
| Law Enforcement                            | 2.374415    | 0.9326902   |
| Transportation/Infrastructure              | 3.155573    | 1.121732    |
| Personal economic evaluation               | 3.05604     | 1.046658    |
| unemployed                                 | 0.0722255   | 0.2588632   |
| Religion                                   | 2.662173    | 1.694713    |
| Family Income                              | 16.48874    | 29.02607    |
| Age                                        | 49.92226    | 16.67187    |
| Education Level                            | 3.621085    | 1.47424     |
| Gender                                     | 1.532331    | 0.4989581   |
| Health Insurance thru employer             | 1.502394    | 0.4999987   |
| Health insurance through exchange          | 1.66799     | 0.4709388   |
| <b>Table 2 Variables</b>                   |             |             |
| Governor Approval                          | 2.890262    | 1.469616    |
| Legislature Approval                       | 2.698688    | 1.265726    |
| Medicaid Expansion                         | 0.2651572   | 0.4414177   |
| Partyid                                    | 3.735773    | 2.180907    |
| Ideology                                   | 4.234778    | 1.774941    |
| Family Income (dichotomous)                | 0.2366549   | 0.4250296   |
| Age                                        | 48.3283     | 16.48874    |
| Gender                                     | 1.530105    | 0.4990938   |
| Education level                            | 3.632299    | 1.461854    |
|                                            |             |             |

| <b>Table 3 Variables</b>              |           |           |
|---------------------------------------|-----------|-----------|
| Governor Support for Work Requirement | 0.13      | 0.3366402 |
| Medicaid Expansion                    | 0.448     | 0.4977867 |
| Republican Governor                   | 0.595     | 0.4878021 |
| Gubernatorial Approval                | 2.974998  | 0.3456198 |
| Republican Legislature                | 0.5772358 | 0.4945014 |
| Partyid of state                      | 3.895266  | 0.3870921 |
| Hospitals Per capita                  | 2.681301  | 0.7359657 |
| Medicaid recipients                   | 0.18038   | 0.0442761 |
| State tax collections per capita      | 2.891844  | 1.025733  |
| Unemployment Rate                     | 5.899797  | 2.16181   |
